# Supplementary material for: A prominent role for precision composting in sustainable agriculture
Source: Research Square preprint supplement (doi:10.21203/rs.3.rs-745873/v1), 2021-08-10
Supplement: Supplementary file 1 [file e31460e7782b62c26b41ee2c.docx]

**Figure.** PRISMA flow diagram showing the procedure used for selection of studies for synthesis.

**Identification**

**Screening**

**Included**

Records identified from

English online databases searching Web of Science, Google Scholar

(n = 729)

Records screened

(n = 800)

Records excluded with reasons of non-field study, non-treatment of mineral fertilizer, unclear details on compost characteristics or field management

(n = 503)

Records after duplicated removed before screening

(n = 800)

Reports assessed for eligibility

(n = 297)

Reports excluded

With reasons of lack of studied indicators (i.e., crop yield, SOC, N2O emissions)

(n = 40)

Studies included in quantitative synthesis (meta-analysis)

(n = 257)

Records identified from

Chinese online databases searching China National Knowledge Infrastructure

(n = 110)
